# Supplementary material
Source: Springer Nature journal article supplement (https://www.springermedizin.de/resource/supplementary/12943_2014_1391_MOESM8_ESM.pdf/9552854)
Supplement: MOESM8 [file 9552854]

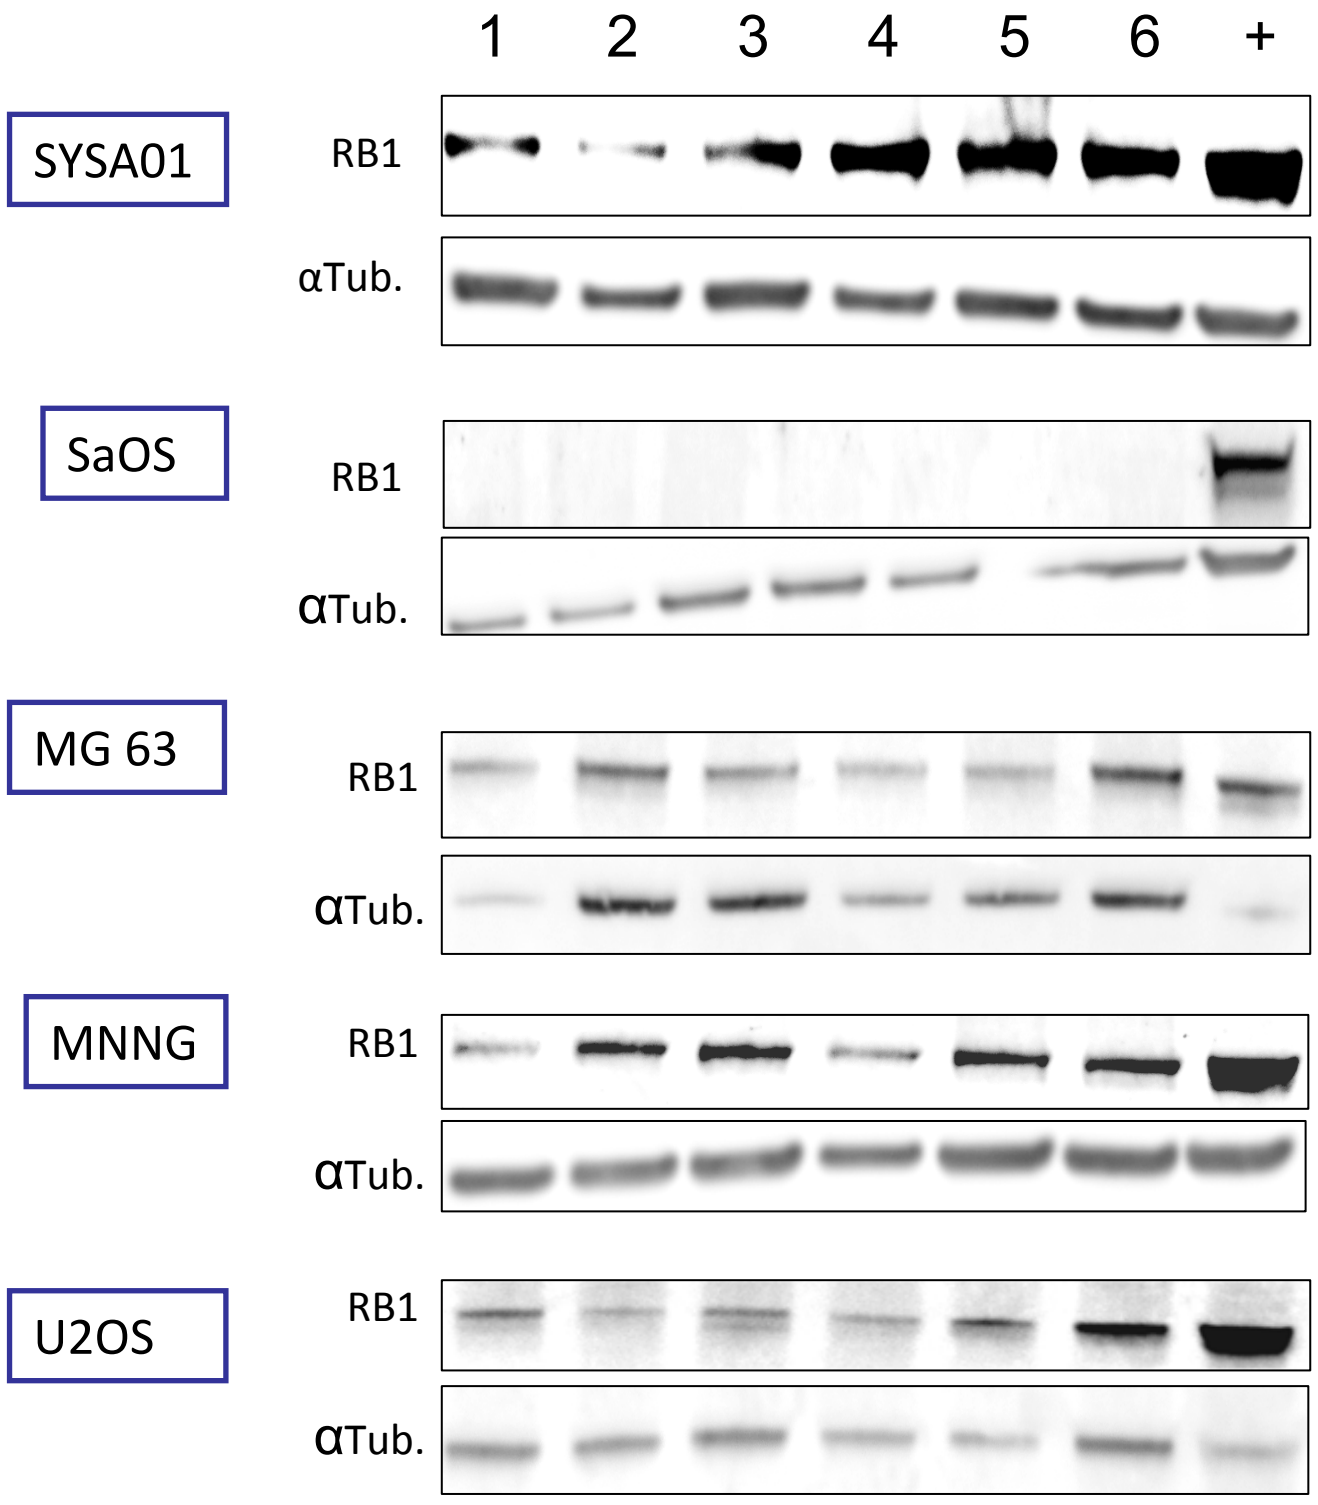

S8a: RB1 protein expression in human osteosarcoma cell lines

20 $\mu$ g protein extracts from 5 unirradiated (1-3) or 4Gy gamma-irradiated (4-6) human OS cell lines were probed on western-blot for RB1 (mAB G3-245, BD Pharmingen) and  $\alpha$ -Tubulin as loading control. Protein extracts were harvested 0h (1,4), 2h (2,5) or 4h (3,6) after treatment. + Positive control: protein extracts from HEK293 cells.

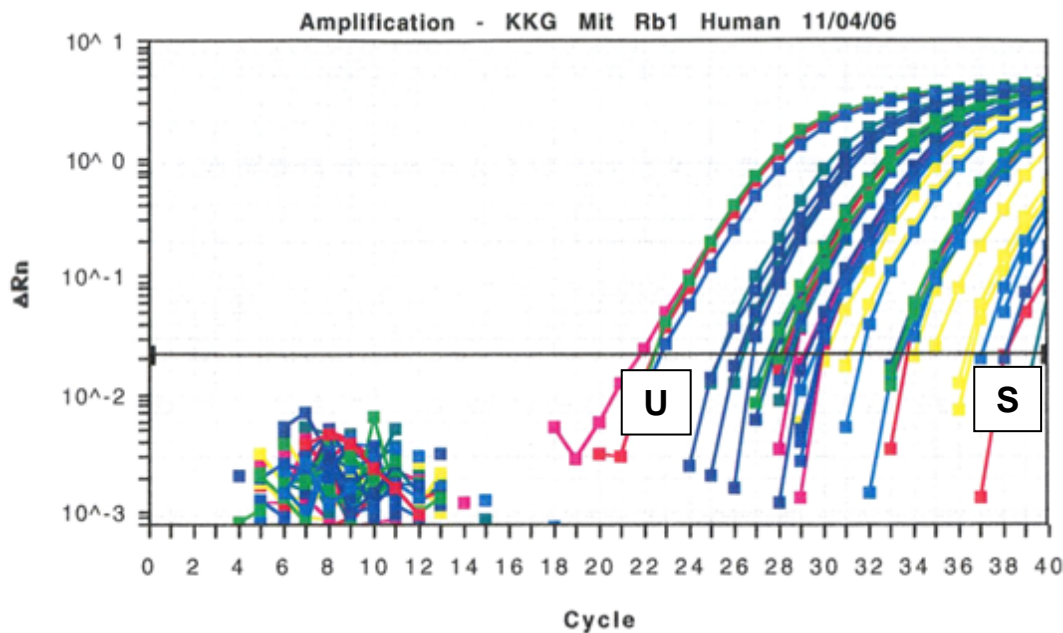

| Case  | Rel. mRNA |
|-------|-----------|
| OS-1  | 2,17      |
| OS-2  | 0,25      |
| OS-3  | 3,66      |
| OS-4  | 1,58      |
| OS-5  | 0,64      |
| OS-6  | 0,17      |
| OS-7  | 1,02      |
| OS-8  | 1,04      |
| OS-9  | 0,34      |
| OS-10 | 0,09      |
| OS-11 | 0,69      |
| OS-12 | 4,36      |
| OS-13 | 0,21      |
| OS-14 | 0,27      |
| OS-15 | 0,20      |
| OS-16 | 1,44      |
| OS-17 | 0,32      |
| OS-18 | 0,52      |
| OS-19 | 0,68      |
| OS-20 | 0,17      |
| OS-21 | 0,19      |
| SaOS  | 0,00      |
| U2OS  | 1,11      |
| Cal   | 1,00      |

## S8b: RB1 mRNA Expression in human osteosarcoma

RB1 cDNA amplification plot and rel. mRNA expression of 21 primary human Osteosarcoma cases in comparison with cell line U2OS (**U**, expressing Rb1) and SaOS (**S**, Rb1 deficient).

After reverse transcription using SuperSript III (Invitrogen) cDNA from tumors and cell-lines were amplified using the real-time quantitative system (Taq.Man) ABI PRISM 7700 SDS (Applied Biosystems) for RB1 (probe Hs00153108\_m1 and TBP (probe Hs00427620\_m1). Expression values are relative to TBP and normalized to a Calibrator (pooled human cell lines)

1 2 3 4 5 6 7 8 9 10 11 12 13 14 15 16 17 18 ntc

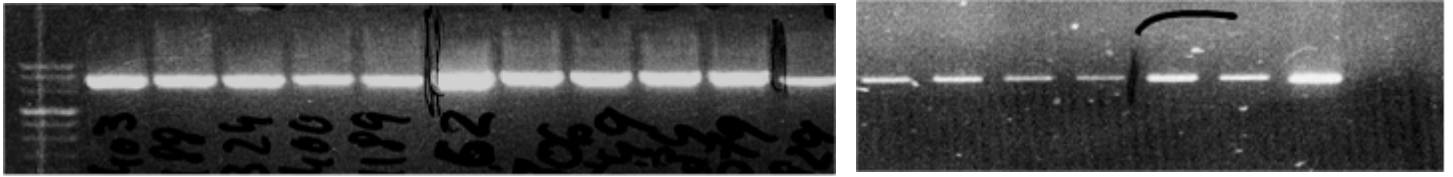

mRb1 Rt-PCR using primers Ex2f-363 and Ex11r-1231 to amplify a 887 bp long fragment from cDNA derived from murine osteosarcoma cell lines 1403, 1188, 1324, 1400, 1189, 62, 306, 549, 734, 679, 1929, 182, 733, 734 (1-11,16-18) and total embryo mRNA from CBA/CA (12-15) + no template control.

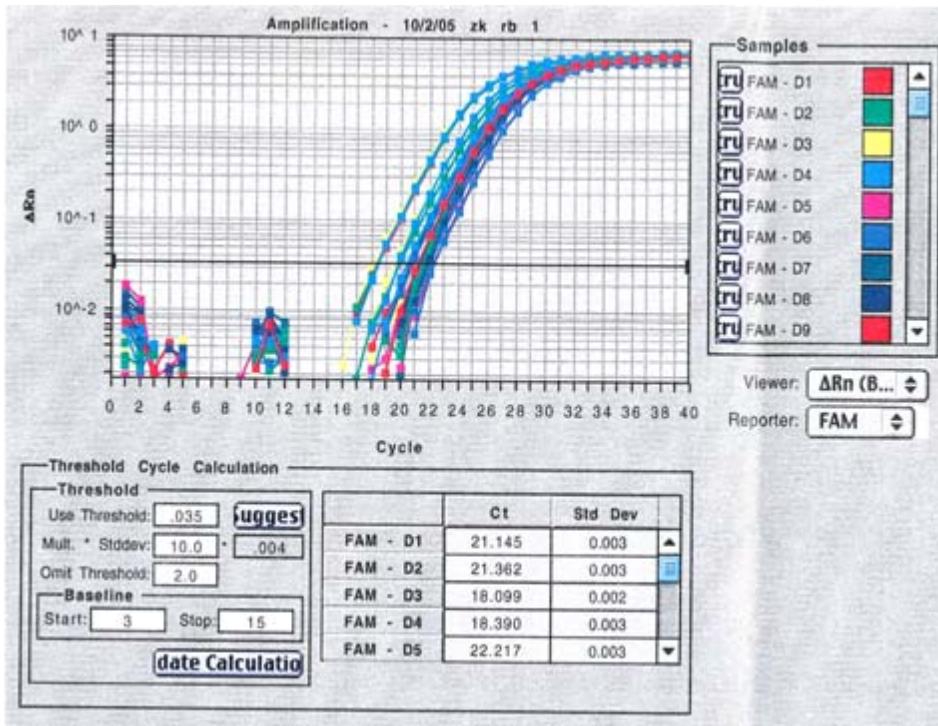

| Cell Line    | Rb1 rel to TBP to embryo |
|--------------|--------------------------|
| MOS62        | 0,32                     |
| MOS162       | 0,68                     |
| MOS184#15    | 0,46                     |
| MOS184#20    | 0,39                     |
| MOS306       | 0,27                     |
| MOS549       | 0,22                     |
| MOS679       | 0,11                     |
| MOS733       | 0,14                     |
| MOS734       | 0,06                     |
| MOS1189      | 0,98                     |
| MOS1324      | 0,18                     |
| MOS1400      | 0,15                     |
| MOS1929      | 0,23                     |
| MC3T3        | 0,09                     |
| Whole Embryo | 1,00                     |
| ntc          | << 0.0001                |

### S8c: Rb1 mRNA expression in murine osteosarcoma cell lines

Rb1 cDNA amplification plot and rel. mRNA expression of 13 murine Osteosarcoma cell lines, mesenchymal cell line MC3T3 in comparison with whole-embryo mRNA.

After reverse transcription using SuperSript III (Invitrogen) cDNA was amplified using the real-time quantitative system (Taq.Man) ABI PRISM 7700 SDS (Applied Biosystems) for mouse Rb1 (probe Mm01310561\_m1) and Tbp (probe Mm00446973\_m1). Rb1 Expression values are relative to TBP and normalized to a Calibrator (whole embryo).
